# Supplementary material for: Cerebral [18F]-FDOPA Uptake in Autism Spectrum Disorder and Its Association with Autistic Traits
Source: MDPI journal article supplement (doi:10.3390/diagnostics11122404), 2021-12-20
Supplement: s1 [file s1]

## Supplementary Methods 1

*Participant exclusion criteria related to psychotropic medication use:*

1. Use of an antipsychotic (ever) if prescribed for a psychotic disorder, as a former psychotic disorder is an exclusion criterion. If not prescribed for psychosis, then:
  - a. Incidental former use of antipsychotic was allowed, if last use had been >1 year ago.
  - b. Regular former use of antipsychotic was allowed, if last use had been >2 years ago.
  - c. Antipsychotic formerly administered as depot medication was allowed, if last injection had been >2 years ago.
2. Use of the antipsychotic quetiapine (ever), if prescribed for a psychotic disorder. In other cases:
  - a. Consumption was allowed if previously consumed in a low dose ( $\leq 50\text{mg}$ ), but last use had been >3 months ago.
  - b. Consumption was allowed if previously consumed in a high dose ( $> 50\text{mg}$ ), but last use had been >6 months ago.
3. Use of medication usually prescribed for attention-deficit/hyperactivity disorder (ADHD) (e.g., methylphenidate). Individuals who had stopped using these drugs for >1 year could participate.
4. Use of benzodiazepine or promethazine, unless last use had been >1 month ago.
5. Use of other psychotropic medication, unless last use had been >3 months ago.

## Supplementary Methods 2

We conducted Bayesian linear regression analyses to, for each of the analysis of interest, quantify the evidence for the alternative hypothesis relative to the null-hypothesis, as expressed by the Bayes factor  $BF_{10}$  (Kelter, 2020). Default JASP priors were used (JZS prior with the  $r$  scale of 0.354).

The results in Supplementary Table 1 consistently indicate ‘anecdotal’ ( $BF_{10} = 1/3-1$ ), ‘substantial’ ( $BF_{10} = 1/10-1/3$ ), or ‘strong’ ( $BF_{10} = 1/30-1/10$ ) evidence for the null-hypothesis (‘no association’) over the alternative hypothesis (Wagenmakers et al., 2011).

## Supplementary references

- Kelter, R. (2020). Bayesian alternatives to null hypothesis significance testing in biomedical research: a non-technical introduction to Bayesian inference with JASP. *BMC Medical Research Methodology*, 20, 142.
- Wagenmakers, E.-J., Wetzels, R., Borsboom, D., & van der Maas, H. L. J. (2011). Why psychologists must change the way they analyze their data: The case of psi: Comment on Bem (2011). *Journal of Personality and Social Psychology*, 100(3), 426-432.

**Table S1.** Bayes factors ( $BF_{10}$ ) for the analyses examining striatal [ $^{18}F$ ]-FDOPA uptake ( $k_i^{cer} \text{ min}^{-1}$ ) in autistic adults and controls, and its association with self-reported autistic traits.

|                   |                             | Association between $k_i^{cer}$ value and AQ scores |           |           |           |           |           |                 |           |           |
|-------------------|-----------------------------|-----------------------------------------------------|-----------|-----------|-----------|-----------|-----------|-----------------|-----------|-----------|
|                   | $k_i^{cer}$                 | ASD                                                 |           |           | Controls  |           |           | Combined sample |           |           |
| ROI               | Difference ASD and controls | Total                                               | Social    | Detail    | Total     | Social    | Detail    | Total           | Social    | Detail    |
|                   | $BF_{10}$                   | $BF_{10}$                                           | $BF_{10}$ | $BF_{10}$ | $BF_{10}$ | $BF_{10}$ | $BF_{10}$ | $BF_{10}$       | $BF_{10}$ | $BF_{10}$ |
| Whole striatum    | 0.209                       | 0.073                                               | 0.073     | 0.331     | 0.248     | 0.248     | 0.240     | 0.210           | 0.225     | 0.327     |
| Putamen           | 0.116                       | 0.052                                               | 0.062     | 0.260     | 0.302     | 0.290     | 0.319     | 0.134           | 0.165     | 0.123     |
| Nucleus accumbens | 0.147                       | 0.054                                               | 0.048     | 0.496     | 0.303     | 0.305     | 0.277     | 0.131           | 0.160     | 0.136     |
| Caudate nucleus   | 0.352                       | 0.107                                               | 0.094     | 0.251     | 0.238     | 0.248     | 0.245     | 0.401           | 0.357     | 0.850     |

ASD, autism spectrum disorder; AQ, Autism Spectrum Quotient; ROI, region-of-interest; Total, AQ total scores; Social, AQ social interaction subscale scores; Detail, AQ attention to detail subscale scores;  $BF_{10}$ , Bayes factor in favor of alternative hypothesis relative to null-hypothesis.

Analyses adjusted for age, sex, smoking status, and PET/CT scanner type.
